# Supplementary material for: Pangenome analysis of Bifidobacterium longum and site-directed mutagenesis through by-pass of restriction-modification systems
Source: PubMed Central journal article supplement (PMC4618763; doi:10.1186/s12864-015-1968-4), 2015-10-21

A

1

2

3

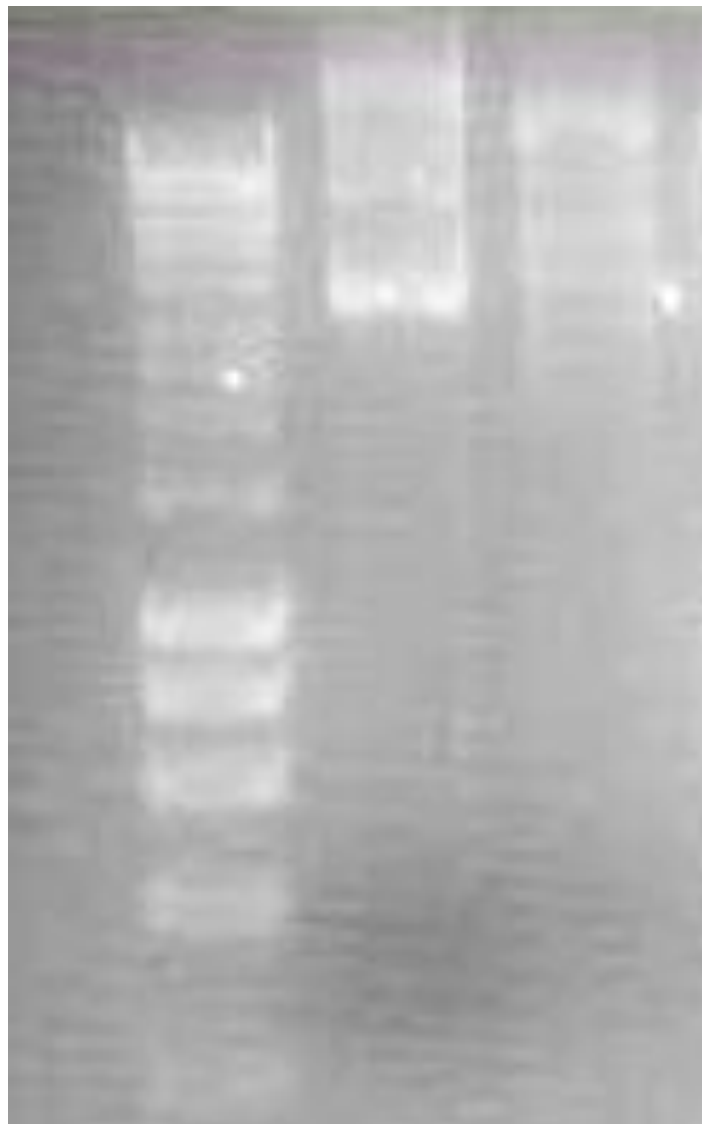

B

1

2

3

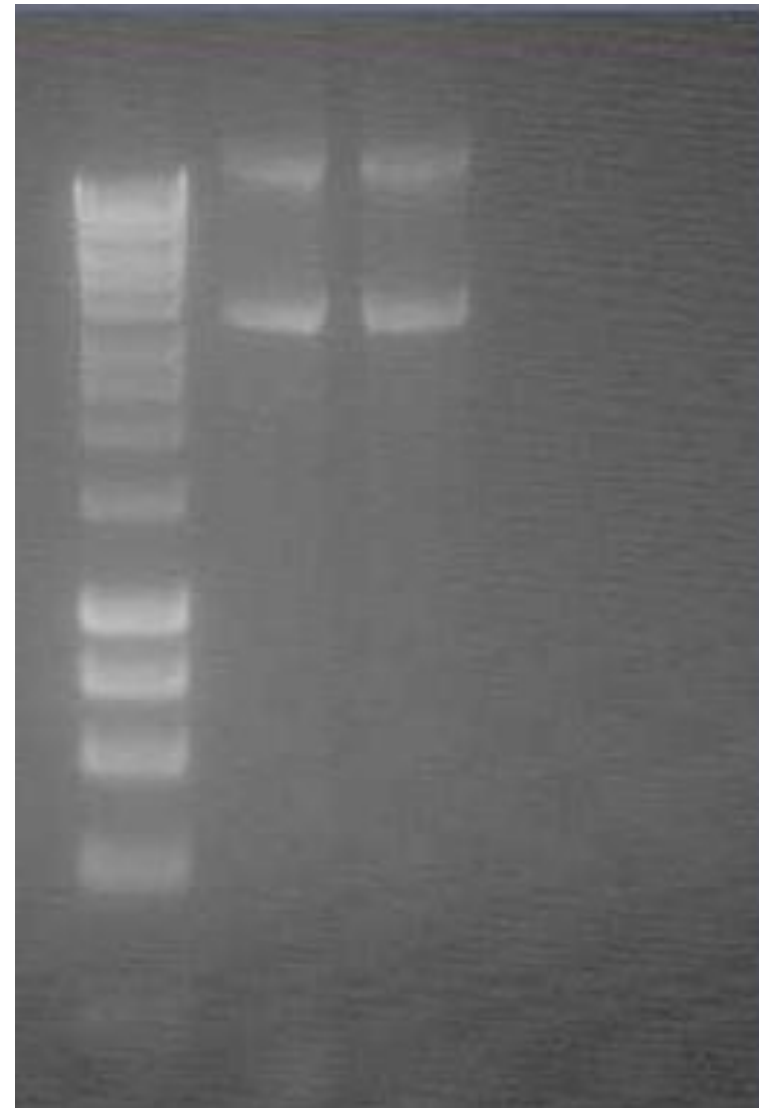

Supplement: 12864_2015_1968_MOESM6_ESM.pdf [file 12864_2015_1968_MOESM6_ESM.pdf]
